# Supplementary material
Source: PubMed Central journal article supplement (PMC5538588)
Supplement: NIHMS882936-supplement.pdf [file NIHMS882936-supplement.pdf]

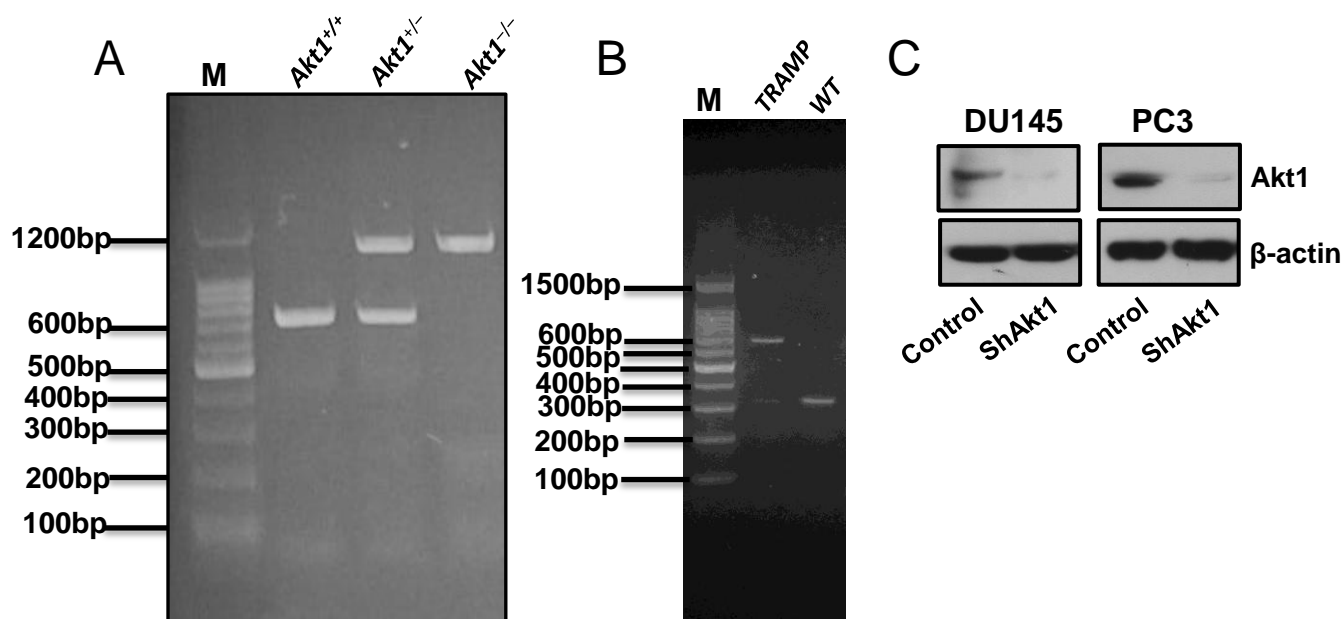

**Supplemental Figure 1. (A and B)** Genotyping of *Akt1*<sup>-/-</sup> and *TRAMP* mice. **(C)** Western blot images showing reduced Akt1 expression in ShAkt1 PC3 and DU145 cells as compared to respective ShControl cells (n = 4).

## *Akt1*<sup>-/-</sup>-TRAMP

31 weeks

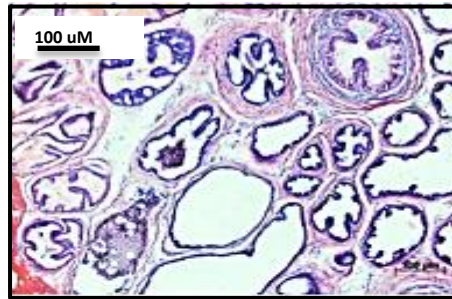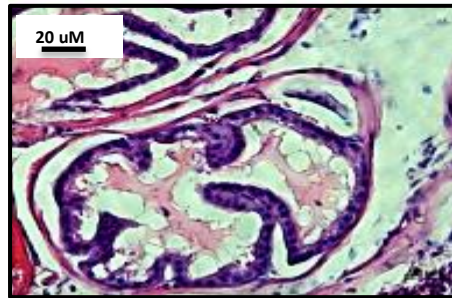

**Supplemental Figure 2.** Representative images of *TRAMP/Akt1*<sup>-/-</sup> mouse prostate tissue section showing the absence of PIN in *TRAMP/Akt1*<sup>-/-</sup> mouse prostate even at 31 weeks of age (n = 9).

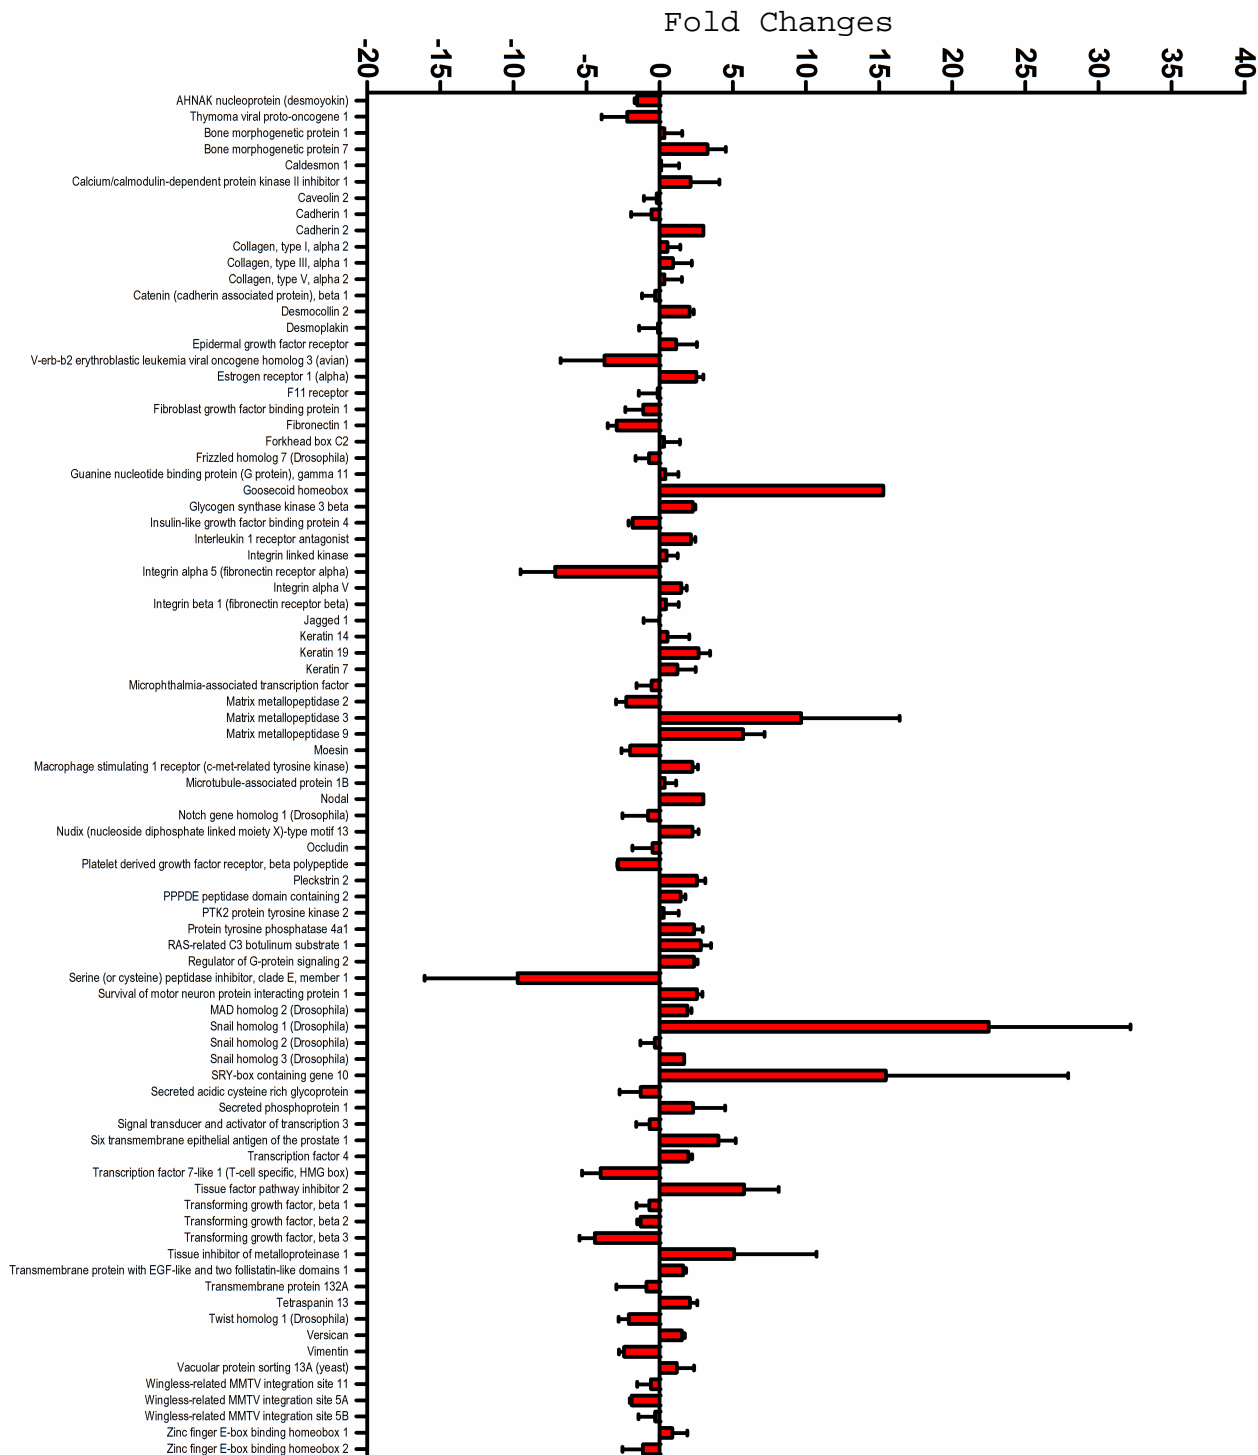

**Supplemental Figure 3.** Gene array analysis of 31-week old *TRAMP* prostates treated with DMSO (Control) or 10 mg/kg triciribine for 6 weeks (n = 4).
